# Supplementary material for: Complete Genome Sequence of Herpes Simplex Virus 2 Strain G
Source: MDPI journal article supplement (doi:10.3390/v14030536), 2022-03-05
Supplement: s1 [file s1]

**Table S5 G vs333 Insertion/Deletion**

| Gene | G.length | 333.length | Iden% | Substitution | Insertion | Deletion |
|------|----------|------------|-------|--------------|-----------|----------|
| RL1  | 771      | 762        | 97.4% | 5            | 6         | 15       |
| RL2  | 2418     | 2445       | 96.8% | 4            | 12        | 39       |
| UL26 | 1911     | 1917       | 99.5% | 4            | 0         | 6        |
| UL27 | 2706     | 2715       | 99.5% | 5            | 0         | 9        |
| UL49 | 903      | 909        | 98.7% | 6            | 0         | 6        |
| UL29 | 3588     | 3591       | 99.7% | 8            | 0         | 3        |
| US2  | 882      | 876        | 99.2% | 1            | 6         | 0        |
| UL46 | 2169     | 2166       | 99.3% | 9            | 5         | 2        |
| UL39 | 3426     | 3435       | 99.6% | 6            | 0         | 9        |
| US11 | 489      | 456        | 96.7% | 1            | 0         | 54*      |
| US12 | 855      | 909        | 93.9% | 1            | 0         | 54       |
| UL52 | 3201     | 3204       | 99.6% | 7            | 1         | 4        |
| UL36 | 9300     | 9360       | 99.0% | 7            | 15        | 75       |
| RS1  | 4023     | 3969       | 98.4% | 8            | 55        | 1        |

\* 54 bp Deletion in strain G genomic sequence cause frameshift of last two amino acids and additional 20 amino acids added at the end.
