# Supplementary material for: Complete Genome Sequence of Herpes Simplex Virus 2 Strain G
Source: MDPI journal article supplement (doi:10.3390/v14030536), 2022-03-05
Supplement: s1 [file s1]

**Table S4 G vs HG52 Substitution Only**

| Gene_Nar | G.length | HG52.leng | iden%  | sub | del | ins | ins/del |
|----------|----------|-----------|--------|-----|-----|-----|---------|
| UL1      | 675      | 675       | 99.85% | 1   | 0   | 0   | 0       |
| UL2      | 1005     | 1005      | 99.70% | 3   | 0   | 0   | 0       |
| UL5      | 2646     | 2646      | 99.89% | 3   | 0   | 0   | 0       |
| UL6      | 2037     | 2037      | 99.95% | 1   | 0   | 0   | 0       |
| UL8      | 2259     | 2259      | 99.87% | 3   | 0   | 0   | 0       |
| UL9      | 2616     | 2616      | 99.96% | 1   | 0   | 0   | 0       |
| UL10     | 1404     | 1404      | 99.93% | 1   | 0   | 0   | 0       |
| UL11     | 291      | 291       | 98.97% | 3   | 0   | 0   | 0       |
| UL12     | 1863     | 1863      | 99.68% | 6   | 0   | 0   | 0       |
| UL13     | 1557     | 1557      | 99.81% | 3   | 0   | 0   | 0       |
| UL14     | 660      | 660       | 99.85% | 1   | 0   | 0   | 0       |
| UL17     | 2109     | 2109      | 99.86% | 3   | 0   | 0   | 0       |
| UL19     | 4125     | 4125      | 99.88% | 5   | 0   | 0   | 0       |
| UL20     | 669      | 669       | 99.85% | 1   | 0   | 0   | 0       |
| UL22     | 2517     | 2517      | 99.92% | 2   | 0   | 0   | 0       |
| UL25     | 1758     | 1758      | 99.83% | 3   | 0   | 0   | 0       |
| UL26.5   | 990      | 990       | 99.80% | 2   | 0   | 0   | 0       |
| UL28     | 2358     | 2358      | 99.87% | 3   | 0   | 0   | 0       |
| UL30     | 3723     | 3723      | 99.97% | 1   | 0   | 0   | 0       |
| UL31     | 918      | 918       | 99.89% | 1   | 0   | 0   | 0       |
| UL34     | 831      | 831       | 99.76% | 2   | 0   | 0   | 0       |
| UL37     | 3345     | 3345      | 99.85% | 5   | 0   | 0   | 0       |
| UL38     | 1401     | 1401      | 99.86% | 2   | 0   | 0   | 0       |
| UL40     | 1014     | 1014      | 99.90% | 1   | 0   | 0   | 0       |
| UL41     | 1479     | 1479      | 99.80% | 3   | 0   | 0   | 0       |
| UL42     | 1413     | 1413      | 99.93% | 1   | 0   | 0   | 0       |
| UL43     | 1245     | 1245      | 99.92% | 1   | 0   | 0   | 0       |
| UL44     | 1443     | 1443      | 99.86% | 2   | 0   | 0   | 0       |
| UL47     | 2091     | 2091      | 99.86% | 3   | 0   | 0   | 0       |
| UL48     | 1473     | 1473      | 99.86% | 2   | 0   | 0   | 0       |
| UL49     | 903      | 903       | 99.89% | 1   | 0   | 0   | 0       |
| UL49A    | 264      | 264       | 99.62% | 1   | 0   | 0   | 0       |
| UL51     | 735      | 735       | 99.86% | 1   | 0   | 0   | 0       |
| UL52     | 3201     | 3201      | 99.78% | 7   | 0   | 0   | 0       |
| UL53     | 1017     | 1017      | 99.51% | 5   | 0   | 0   | 0       |
| UL56     | 708      | 708       | 99.72% | 2   | 0   | 0   | 0       |
| US1      | 1245     | 1245      | 99.68% | 4   | 0   | 0   | 0       |
| US3      | 1446     | 1446      | 99.79% | 3   | 0   | 0   | 0       |
| US5      | 279      | 279       | 99.64% | 1   | 0   | 0   | 0       |
| US6      | 1182     | 1182      | 99.83% | 2   | 0   | 0   | 0       |
| US7      | 1119     | 1119      | 99.82% | 2   | 0   | 0   | 0       |
| US8A     | 441      | 441       | 99.77% | 1   | 0   | 0   | 0       |
| US9      | 270      | 270       | 99.26% | 2   | 0   | 0   | 0       |
| US10     | 261      | 261       | 99.62% | 1   | 0   | 0   | 0       |
