# Supplementary material for: Complete Genome Sequence of Herpes Simplex Virus 2 Strain G
Source: MDPI journal article supplement (doi:10.3390/v14030536), 2022-03-05
Supplement: s1 [file s1]

**Table S6 G vs 333 Substitution Only**

| Gene   | G.length | 333.length | Iden%  | Sub | Ins | Del |
|--------|----------|------------|--------|-----|-----|-----|
| UL4    | 606      | 606        | 99.8%  | 1   | 0   | 0   |
| UL1    | 675      | 675        | 99.9%  | 1   | 0   | 0   |
| UL7    | 891      | 891        | 99.9%  | 1   | 0   | 0   |
| UL2    | 1005     | 1005       | 99.8%  | 2   | 0   | 0   |
| UL14   | 660      | 660        | 99.8%  | 1   | 0   | 0   |
| UL10   | 1404     | 1404       | 99.8%  | 3   | 0   | 0   |
| UL20   | 669      | 669        | 99.9%  | 1   | 0   | 0   |
| UL18   | 957      | 957        | 99.9%  | 1   | 0   | 0   |
| UL13   | 1557     | 1557       | 99.8%  | 3   | 0   | 0   |
| UL6    | 2037     | 2037       | 99.9%  | 3   | 0   | 0   |
| UL12   | 1863     | 1863       | 99.8%  | 3   | 0   | 0   |
| UL8    | 2259     | 2259       | 99.8%  | 5   | 0   | 0   |
| UL23   | 1131     | 1131       | 99.9%  | 1   | 0   | 0   |
| UL9    | 2616     | 2616       | 99.9%  | 3   | 0   | 0   |
| UL5    | 2646     | 2646       | 99.9%  | 2   | 0   | 0   |
| UL31   | 918      | 918        | 99.8%  | 2   | 0   | 0   |
| UL25   | 1758     | 1758       | 99.9%  | 1   | 0   | 0   |
| UL34   | 831      | 831        | 99.9%  | 1   | 0   | 0   |
| UL26.5 | 990      | 990        | 99.6%  | 4   | 0   | 0   |
| UL22   | 2517     | 2517       | 99.9%  | 2   | 0   | 0   |
| UL40   | 1014     | 1014       | 99.9%  | 1   | 0   | 0   |
| UL32   | 1791     | 1791       | 99.8%  | 3   | 0   | 0   |
| UL38   | 1401     | 1401       | 99.8%  | 3   | 0   | 0   |
| UL41   | 1479     | 1479       | 99.7%  | 4   | 0   | 0   |
| UL42   | 1413     | 1413       | 99.7%  | 4   | 0   | 0   |
| UL43   | 1245     | 1245       | 81.0%  | 14  | 4   | 4   |
| UL19   | 4125     | 4125       | 100.0% | 2   | 0   | 0   |
| UL44   | 1443     | 1443       | 99.9%  | 2   | 0   | 0   |
| UL50   | 1110     | 1110       | 99.9%  | 1   | 0   | 0   |
| UL48   | 1473     | 1473       | 99.7%  | 4   | 0   | 0   |
| UL53   | 1017     | 1017       | 99.7%  | 3   | 0   | 0   |
| US5    | 279      | 279        | 99.6%  | 1   | 0   | 0   |
| UL56   | 708      | 708        | 99.9%  | 1   | 0   | 0   |
| UL30   | 3723     | 3723       | 100.0% | 1   | 0   | 0   |
| UL47   | 2091     | 2091       | 99.7%  | 6   | 0   | 0   |
| US1    | 1245     | 1245       | 99.4%  | 7   | 0   | 0   |
| UL37   | 3345     | 3345       | 99.9%  | 3   | 0   | 0   |
| US9    | 270      | 270        | 99.3%  | 2   | 0   | 0   |
| US6    | 1182     | 1182       | 99.7%  | 3   | 0   | 0   |
| US3    | 1446     | 1446       | 99.9%  | 2   | 0   | 0   |
| US7    | 1119     | 1119       | 99.6%  | 4   | 0   | 0   |
| US4    | 2097     | 2097       | 99.5%  | 10  | 0   | 0   |
| US8    | 1647     | 1647       | 99.8%  | 3   | 0   | 0   |
