# Supplementary material for: Complete Genome Sequence of Herpes Simplex Virus 2 Strain G
Source: MDPI journal article supplement (doi:10.3390/v14030536), 2022-03-05
Supplement: s1 [file s1]

Table S7. Pairwise distance of HSV-2 strains

|              | HSV2_1192 | HSV2_CtSF | HSV2_COH3818 | HSV2_GSC-56 | HSV2_CtSF-R | HSV2_2007-82 | HSV2_2007-38 | HSV2_SD90e | HSV2_G   | HSV2_SD66 | HSV2_JA2_JP | HSV2_9335-20 | HSV2_7444-19 | HSV2_J32715 | HSV2_Bethesd | HSV2_MS  | HSV2_CTSampl | HSV2_HG52 | HSV2_K39924 | HSV2_44-4198 | HSV2_333 | HSV1_17 |
|--------------|-----------|-----------|--------------|-------------|-------------|--------------|--------------|------------|----------|-----------|-------------|--------------|--------------|-------------|--------------|----------|--------------|-----------|-------------|--------------|----------|---------|
| HSV2_1192    |           |           |              |             |             |              |              |            |          |           |             |              |              |             |              |          |              |           |             |              |          |         |
| HSV2_CtSF    | 0.002581  |           |              |             |             |              |              |            |          |           |             |              |              |             |              |          |              |           |             |              |          |         |
| HSV2_COH3818 | 0.002861  | 0.001089  |              |             |             |              |              |            |          |           |             |              |              |             |              |          |              |           |             |              |          |         |
| HSV2_GSC-56  | 0.002460  | 0.000272  | 0.000968     |             |             |              |              |            |          |           |             |              |              |             |              |          |              |           |             |              |          |         |
| HSV2_CtSF-R  | 0.002852  | 0.001080  | 0.000122     | 0.000959    |             |              |              |            |          |           |             |              |              |             |              |          |              |           |             |              |          |         |
| HSV2_2007-82 | 0.003097  | 0.003264  | 0.003543     | 0.003143    | 0.003534    |              |              |            |          |           |             |              |              |             |              |          |              |           |             |              |          |         |
| HSV2_2007-38 | 0.003315  | 0.001831  | 0.002110     | 0.001710    | 0.002101    | 0.003998     |              |            |          |           |             |              |              |             |              |          |              |           |             |              |          |         |
| HSV2_SD90e   | 0.002966  | 0.001481  | 0.001761     | 0.001360    | 0.001752    | 0.003648     | 0.001629     |            |          |           |             |              |              |             |              |          |              |           |             |              |          |         |
| HSV2_G       | 0.001889  | 0.002530  | 0.002809     | 0.002409    | 0.002800    | 0.003046     | 0.003264     | 0.002915   |          |           |             |              |              |             |              |          |              |           |             |              |          |         |
| HSV2_SD66    | 0.002670  | 0.002184  | 0.002463     | 0.002063    | 0.002454    | 0.003352     | 0.002918     | 0.002568   | 0.002619 |           |             |              |              |             |              |          |              |           |             |              |          |         |
| HSV2_JA2_JP  | 0.002921  | 0.002967  | 0.003246     | 0.002846    | 0.003237    | 0.003603     | 0.003701     | 0.003352   | 0.002870 | 0.003056  |             |              |              |             |              |          |              |           |             |              |          |         |
| HSV2_9335-20 | 0.002418  | 0.002129  | 0.002409     | 0.002008    | 0.002400    | 0.003100     | 0.002863     | 0.002514   | 0.002367 | 0.002218  | 0.002804    |              |              |             |              |          |              |           |             |              |          |         |
| HSV2_7444-19 | 0.002569  | 0.002615  | 0.002894     | 0.002494    | 0.002885    | 0.003251     | 0.003349     | 0.002999   | 0.002517 | 0.002703  | 0.002680    | 0.002451     |              |             |              |          |              |           |             |              |          |         |
| HSV2_J32715  | 0.003113  | 0.003159  | 0.003438     | 0.003038    | 0.003430    | 0.003795     | 0.003893     | 0.003544   | 0.003062 | 0.003248  | 0.002474    | 0.002996     | 0.002872     |             |              |          |              |           |             |              |          |         |
| HSV2_Bethesd | 0.002656  | 0.002702  | 0.002981     | 0.002581    | 0.002972    | 0.003338     | 0.003436     | 0.003086   | 0.002605 | 0.002790  | 0.002454    | 0.002538     | 0.002415     | 0.002646    |              |          |              |           |             |              |          |         |
| HSV2_MS      | 0.002835  | 0.002881  | 0.003161     | 0.002760    | 0.003152    | 0.003518     | 0.003615     | 0.003266   | 0.002784 | 0.002970  | 0.002947    | 0.002718     | 0.002215     | 0.003139    | 0.002682     |          |              |           |             |              |          |         |
| HSV2_CTSampl | 0.002850  | 0.003017  | 0.003296     | 0.002896    | 0.003287    | 0.002871     | 0.003751     | 0.003402   | 0.002799 | 0.003106  | 0.003357    | 0.002854     | 0.003004     | 0.003549    | 0.003092     | 0.003271 |              |           |             |              |          |         |
| HSV2_HG52    | 0.002465  | 0.002632  | 0.002911     | 0.002511    | 0.002903    | 0.002486     | 0.003366     | 0.003017   | 0.002414 | 0.002721  | 0.002972    | 0.002469     | 0.002619     | 0.003164    | 0.002707     | 0.002886 | 0.000693     |           |             |              |          |         |
| HSV2_K39924  | 0.002848  | 0.003015  | 0.003294     | 0.002894    | 0.003285    | 0.000946     | 0.003749     | 0.003399   | 0.002797 | 0.003103  | 0.003354    | 0.002851     | 0.003002     | 0.003546    | 0.003089     | 0.003269 | 0.002622     | 0.002237  |             |              |          |         |
| HSV2_44-4198 | 0.002466  | 0.001668  | 0.001947     | 0.001547    | 0.001938    | 0.003148     | 0.002402     | 0.002052   | 0.002414 | 0.002088  | 0.002851    | 0.002014     | 0.002499     | 0.003043    | 0.002586     | 0.002765 | 0.002901     | 0.002516  | 0.002899    |              |          |         |
| HSV2_333     | 0.002618  | 0.000163  | 0.001126     | 0.000309    | 0.001117    | 0.003301     | 0.001868     | 0.001518   | 0.002567 | 0.002221  | 0.003004    | 0.002166     | 0.002652     | 0.003196    | 0.002739     | 0.002918 | 0.003054     | 0.002669  | 0.003052    | 0.001705     |          |         |
| HSV1_17      | 0.573340  | 0.573507  | 0.573786     | 0.573386    | 0.573777    | 0.572038     | 0.574241     | 0.573891   | 0.573289 | 0.573595  | 0.573847    | 0.573343     | 0.573494     | 0.574039    | 0.573581     | 0.573761 | 0.573114     | 0.572729  | 0.571789    | 0.573391     | 0.573544 |         |
