# Supplementary material for: Complete Genome Sequence of Herpes Simplex Virus 2 Strain G
Source: MDPI journal article supplement (doi:10.3390/v14030536), 2022-03-05
Supplement: s1 [file s1]

**Table S3 G vs HG52 Insertion/Deletion**

| Gene_Name | G.length | HG52.length | iden%  | substitution | Deletion | Insertion |
|-----------|----------|-------------|--------|--------------|----------|-----------|
| RL1       | 771      | 786         | 96.95% | 5            | 0        | 15        |
| RL2       | 2418     | 2505        | 98.48% | 7            | 12       | 99        |
| UL26      | 1911     | 1914        | 99.63% | 4            | 0        | 3         |
| UL27      | 2706     | 2715        | 99.52% | 4            | 0        | 9         |
| UL29      | 3588     | 3591        | 99.78% | 5            | 0        | 3         |
| UL32      | 1791     | 1797        | 99.55% | 2            | 0        | 6         |
| UL36      | 9300     | 9369        | 99.15% | 11           | 0        | 69        |
| UL39      | 3426     | 3429        | 98.69% | 30           | 6        | 9         |
| US2       | 882      | 876         | 99.21% | 1            | 6        | 0         |
| US4       | 2097     | 2100        | 99.48% | 8            | 0        | 3         |
| US8       | 1647     | 1638        | 99.27% | 3            | 9        | 0         |
| US12      | 855      | 909         | 93.95% | 1            | 0        | 54        |
| US11      | 489      | 456         | ??     | 0            | 0        | 49*       |
| RS1       | 4023     | 3957        | 98.06% | 6            | 69       | 3         |

\* 54 bp Deletion in strain G genomic sequence cause frameshift of last two amino acids and additional 20 amino acids added at the end.
