# Supplementary material for: Complete Genome Sequence of Herpes Simplex Virus 2 Strain G
Source: MDPI journal article supplement (doi:10.3390/v14030536), 2022-03-05
Supplement: s1 [file s1]

**Table S2. G vs MS Substitution Only**

| Gene CDS | G.length | MS.length | iden%  | Substitution | Deletion | Insertion |
|----------|----------|-----------|--------|--------------|----------|-----------|
| UL1      | 675      | 675       | 99.9%  | 1            | 0        | 0         |
| UL2      | 1005     | 1005      | 99.7%  | 3            | 0        | 0         |
| UL4      | 606      | 606       | 99.8%  | 1            | 0        | 0         |
| UL5      | 2646     | 2646      | 99.9%  | 3            | 0        | 0         |
| UL6      | 2037     | 2037      | 100.0% | 1            | 0        | 0         |
| UL8      | 2259     | 2259      | 99.8%  | 4            | 0        | 0         |
| UL9      | 2616     | 2616      | 99.9%  | 2            | 0        | 0         |
| UL10     | 1404     | 1404      | 99.9%  | 2            | 0        | 0         |
| UL12     | 1863     | 1863      | 99.9%  | 2            | 0        | 0         |
| UL13     | 1557     | 1557      | 99.9%  | 2            | 0        | 0         |
| UL14     | 660      | 660       | 99.8%  | 1            | 0        | 0         |
| UL17     | 2109     | 2109      | 99.9%  | 2            | 0        | 0         |
| UL18     | 957      | 957       | 99.9%  | 1            | 0        | 0         |
| UL19     | 4125     | 4125      | 99.9%  | 6            | 0        | 0         |
| UL20     | 669      | 669       | 99.7%  | 2            | 0        | 0         |
| UL21     | 1599     | 1599      | 99.8%  | 3            | 0        | 0         |
| UL22     | 2517     | 2517      | 99.7%  | 7            | 0        | 0         |
| UL23     | 1131     | 1131      | 99.8%  | 2            | 0        | 0         |
| UL24     | 846      | 846       | 99.9%  | 1            | 0        | 0         |
| UL25     | 1758     | 1758      | 99.9%  | 2            | 0        | 0         |
| UL26.5   | 990      | 990       | 99.9%  | 1            | 0        | 0         |
| UL27     | 2706     | 2706      | 99.7%  | 8            | 0        | 0         |
| UL28     | 2358     | 2358      | 99.4%  | 15           | 0        | 0         |
| UL31     | 918      | 918       | 99.8%  | 2            | 0        | 0         |
| UL32     | 1791     | 1791      | 99.8%  | 3            | 0        | 0         |
| UL33     | 393      | 393       | 99.7%  | 1            | 0        | 0         |
| UL34     | 831      | 831       | 99.8%  | 2            | 0        | 0         |
| UL36     | 9300     | 9300      | 99.9%  | 9            | 0        | 0         |
| UL37     | 3345     | 3345      | 99.9%  | 2            | 0        | 0         |
| UL38     | 1401     | 1401      | 99.7%  | 4            | 0        | 0         |
| UL40     | 1014     | 1014      | 99.7%  | 3            | 0        | 0         |
| UL41     | 1479     | 1479      | 99.7%  | 5            | 0        | 0         |
| UL42     | 1413     | 1413      | 99.8%  | 3            | 0        | 0         |
| UL43     | 1245     | 1245      | 99.7%  | 4            | 0        | 0         |
| UL44     | 1443     | 1443      | 99.8%  | 3            | 0        | 0         |
| UL45     | 519      | 519       | 99.8%  | 1            | 0        | 0         |
| UL47     | 2091     | 2091      | 99.8%  | 5            | 0        | 0         |
| UL48     | 1473     | 1473      | 99.9%  | 2            | 0        | 0         |
| UL50     | 1110     | 1110      | 99.9%  | 1            | 0        | 0         |
| UL52     | 3201     | 3201      | 99.8%  | 6            | 0        | 0         |
| UL53     | 1017     | 1017      | 99.5%  | 5            | 0        | 0         |
| UL54     | 1539     | 1539      | 99.9%  | 1            | 0        | 0         |
| UL56     | 708*     | 738       | 99.6%  | 3            | 0        | 0         |
| US1      | 1245     | 1245      | 99.7%  | 4            | 0        | 0         |
| US3      | 1446     | 1446      | 99.6%  | 6            | 0        | 0         |
| US4      | 2097     | 2097      | 99.5%  | 11           | 0        | 0         |
| US5      | 279      | 279       | 99.6%  | 1            | 0        | 0         |
| US6      | 1182     | 1182      | 99.8%  | 2            | 0        | 0         |
| US7      | 1119     | 1119      | 99.6%  | 5            | 0        | 0         |
| US8A     | 441      | 441       | 99.8%  | 1            | 0        | 0         |
| US9      | 270      | 270       | 99.6%  | 1            | 0        | 0         |
| US10     | 261      | 261       | 99.2%  | 2            | 0        | 0         |
