# Supplementary material for: Complete Genome Sequence of Herpes Simplex Virus 2 Strain G
Source: MDPI journal article supplement (doi:10.3390/v14030536), 2022-03-05
Supplement: s1 [file s1]

**Table S1 G vs MS Insertion/Deletion**

| strain G | G.length | MS.length | iden% | Substitution | Insertion | Deletion |
|----------|----------|-----------|-------|--------------|-----------|----------|
| RL1      | 771      | 762       | 96.3% | 3            | 15        | 6        |
| RL2      | 2418     | 2406      | 99.1% | 4            | 12        | 0        |
| UL26     | 1911     | 1917      | 99.6% | 1            | 0         | 6        |
| UL29     | 3588     | 3594      | 99.6% | 8            | 0         | 6        |
| UL30     | 3723     | 3717      | 99.8% | 1            | 6         | 0        |
| UL39     | 3426     | 3435      | 99.6% | 6            | 0         | 9        |
| UL46     | 2169     | 2166      | 99.2% | 8            | 6         | 3        |
| UL49     | 903      | 909       | 99.0% | 3            | 0         | 6        |
| RS1      | 4023     | 3996      | 96.0% | 13           | 89        | 62       |
| US2      | 882      | 876       | 99.1% | 2            | 6         | 0        |
| US8      | 1647     | 1638      | 99.3% | 3            | 9         | 0        |
| US12     | 855      | 909       | 94.1% | 0            | 0         | 54       |
| US11     | 489      | 456       | 96.7% | 1            | 0         | 49*      |

\* 54 bp Deletion in strain G genomic sequence cause frameshift of last two amino acids and additional 20 amino acids added at the end.
